# Supplementary material
Source: publisher figshare collection journal article supplement (https://tandf.figshare.com/articles/dataset/_/24272170)
Supplement: Supplementary file 1 [file 1]

## Sheet: Table S1
Table S1 Information on the 75 loci examined in this study.
Locus	Chr.	Position (GRCh38)	Gene	Reference		Locus	Chr.	Position (GRCh38)	Gene	Reference
rs10487075	7	88965021	ZNF804B	Yamaguchi-Kabata et al.		rs3131854	6	29611885	-	Kamitsuji et al.
rs10505662	8	137663320	LINC02055	Kamitsuji et al.		rs35961591	1	187326166	-	Kamitsuji et al.
rs10512572	17	69512099	-	Nakanishi et al.		rs3732530	3	47618953	CSPG5	Yamaguchi-Kabata et al.
rs11145017	9	79324955	PRUNE2	Yamaguchi-Kabata et al.		rs3734166	5	137665323	CDC25C	Yamaguchi-Kabata et al.
rs11585486	1	107247169	-	Kamitsuji et al.		rs3736331	1	2318653	MORN1	Kamitsuji et al.
rs12498138	3	121459589	GOLGB1	Nakanishi et al.		rs3739868	9	35103565	STOML2	Yuasa et al.
rs12544346	8	86424616	LOC105375937	Nakanishi et al.		rs3744921	18	29867688	GAREM1	Yamaguchi-Kabata et al.
rs12629908	3	120522716	-	Nakanishi et al.		rs3745099	19	52901905	ZNF528	Nakanishi et al.
rs13074239	3	173976705	NLGN1	Kamitsuji et al.		rs3756323	5	140579358	PCDHB11	Yamaguchi-Kabata et al.
rs14103	1	35321242	SMIM12	Yamaguchi-Kabata et al.		rs3765534	13	95815415	ABCC4	Yamaguchi-Kabata et al.
rs1503767	12	118889488	-	Nakanishi et al.		rs3778922	7	151802332	GALNT11	Yamaguchi-Kabata et al.
rs1569175	2	201021954	-	Nakanishi et al.		rs3781409	10	126715629	CTBP2	Yamaguchi-Kabata et al.
rs17048799	4	137529812	-	Kamitsuji et al.		rs3799879	6	46564968	CYP39A1	Kamitsuji et al.
rs17142849	7	20483649	ABCB5	Kamitsuji et al.		rs3804491	6	52420356	TRAM2	Yuasa et al.
rs17707947	5	16877744	MYO10	Yamaguchi-Kabata et al.		rs3907047	20	54000914	-	Nakanishi et al.
rs17822931	16	48258198	ABCC11	Yamaguchi-Kabata et al.		rs4463276	6	145055331	UTRN	Nakanishi et al.
rs1800414	15	28197037	OCA2	Nakanishi et al.		rs4687887	3	119515585	NR1I2	Kamitsuji et al.
rs1834619	2	17901485	SMC6	Nakanishi et al.		rs4746136	10	75300994	USP54	Nakanishi et al.
rs1876482	2	17362568	-	Nakanishi et al.		rs4908343	1	27931698	AHDC1	Nakanishi et al.
rs1950993	14	58238687	SLC35F4	Nakanishi et al.		rs56234154	3	194452126	LINC01968	Kamitsuji et al.
rs2070235	20	42331457	MYBL2	Yamaguchi-Kabata et al.		rs6133198	16	5249937	-	Yuasa et al.
rs2075352	3	10311939	TATDN2	Yamaguchi-Kabata et al.		rs6548616	3	79399575	ROBO1	Nakanishi et al.
rs2118303	2	64424920	LINC00309	Kamitsuji et al.		rs671	12	112241766	ALDH2	Nakanishi et al.
rs214678	12	47676950	-	Nakanishi et al.		rs705308	7	97695363	-	Nakanishi et al.
rs2166624	13	42579985	LOC105370176	Nakanishi et al.		rs7251928	19	4077096	-	Nakanishi et al.
rs2228226	12	57865821	GLI1	Yamaguchi-Kabata et al.		rs731257	7	12669251	SCIN	Nakanishi et al.
rs2273697	10	101563815	ABCC2	Yamaguchi-Kabata et al.		rs74072017	12	32367771	BICD1	Kamitsuji et al.
rs2274067	1	231376806	C1orf131	Yamaguchi-Kabata et al.		rs75092884	4	16346411	-	Kamitsuji et al.
rs2275586	10	99240758	MMS19	Yamaguchi-Kabata et al.		rs77504770	18	60528759	PHLPP1	Kamitsuji et al.
rs2285715	4	110639043	PLA2G12A	Yuasa et al.		rs79707667	5	165740423	-	Kamitsuji et al.
rs2289080	2	233406178	CHRNG	Yamaguchi-Kabata et al.		rs7995174	13	32326383	RXFP2	Kamitsuji et al.
rs2289178	15	49054772	CEP152	Yamaguchi-Kabata et al.		rs79980740	7	23430418	IGF2BP3	Kamitsuji et al.
rs2289403	10	190635971	ORMDL1	Yuasa et al.		rs8035124	15	92105708	-	Nakanishi et al.
rs2295612	1	160616703	SLAMF1	Yamaguchi-Kabata et al.		rs881728	18	59333108	-	Nakanishi et al.
rs2465811	12	70990054	PTPRB	Yamaguchi-Kabata et al.		rs928302	21	43810084	TMPRSS3	Yamaguchi-Kabata et al.
rs2589957	15	90903311	ZNF774	Yamaguchi-Kabata et al.		rs9845457	3	135914476	MSL2	Nakanishi et al.
rs2702414	4	179399523	-	Nakanishi et al.		rs9932051	16	10574796	ATF7IP2	Yamaguchi-Kabata et al.
rs2966849	16	85183682	LOC105371382	Nakanishi et al.

## Sheet: Table S2
Table S2 Primer sequences used for the 48 loci.
Locus	Forward	Reverse	bp	PCR
rs10487075	CCTAATTGCCAGGGAACTCA	AGGGGTCCTCTCTCCTTCTG	237	3B
rs10505662	CCCCAGCTTTCATGCCGTAT	AGCCACATCTGTCAACCACG	247	3I
rs11145017	CATTCGGGTCCCTAACAGAA	GTCAGCCTGAACTGGGTAGC	336	3D
rs11585486	TTGTGTCGCTCCACATCTTC	ACTGCACATCCAAATGCAAA	515	3H
rs13074239	GAAGGAGAGGGTGGAAGAGG	TGGGAAAGAGGGATGCTATG	425	3L
rs14103	ATTTGTGTGGCTGTGTGGTG	GTGGGTTACCACCTGGAATG	337	3C
rs17048799	ACCATCATACCTGGGCTTTTCC	AAAGACAATTAGTGCATCAGGGTT	220	3L
rs17142849	TTTGCACTGCTATCCTAATTGTCC	CCCTCAGGGAGAGAGGAATTTT	216	3J
rs17707947	ATACCCAGGAGGGAAACCAG	TTACAGGGAACACGGGTCTG	373	2D
rs17822931	CTAAGTGCCAGGGACATGGT	TTCAGTGCTTCTGGTGATGC	331	2A
rs2070235	GTCACATCAGCAGCAAGTCC	AGGGCAGGGTCTTAACAGGT	305	2C
rs2075352	GATAGGGAGGTGGTGATGGA	GGGGTAGCTAGAAGGCTTGG	234	2D
rs2118303	AGGAATCATAGTGGGAGATATGAAC	GTGGTGGCAAAGATACCTCCT	589	3J
rs2228226	ACCCCCTGGACTCTCTTGAT	ATGCGATCTGTGATGGATGA	251	3E
rs2273697	GGAGCACATCCTTCCATTGT	TGGGATTACAAGCACCATCA	319	3B
rs2274067	GGACGAGTTGGAAGGTTTGA	GCAGAATGAGGGTTGATTCC	343	3A
rs2275586	GCTCAGCAATCCAGGAAGAC	CCTCTGTTGGCTCTTGGTGT	400	3D
rs2285715	ACACTTTGTCAGGGAAGGGA	GAGCAGTGAGGCATAGCTGA	249	3K
rs2289080	CTGGCCTGTTCTGTGCATAC	CCAATAAATGGCCTCACTGG	195	3D
rs2289178	TCTTCATAGCCCCCTTGATG	CAGCTGTGGTTGCTTTTCTG	323	3A
rs2289403	GGTGAACCTCCATGAACTCTGT	ACATTTCCAGTCATTCAGCTGTG	261	3H
rs2295612	GCTTAGAGCCCCTCATTTCC	CTCCTCATTGGCTGATGGAT	332	3F
rs2465811	CGTTTTCCTCCAGAAACAGC	TGCCTTGCAGATCCTTTACC	257	3B
rs2589957	CTGCTGCAGAAACAGGGATT	GGTTCCATGTTGCCCTTCTA	258	3C
rs3131854	ACATAGCAGCGCTAATGGTGG	CCACCCGTGTCCCTATTTCAT	498	3G
rs35961591	GAAGTGCTGATGGGATATGG	GGATTGCTGCATCTCAAGATAA	218	3K
rs3732530	TCCTCCTCCTCTTCATCCAA	CAGCTTCTGAACTCCCCAAG	355	3F
rs3734166	CCTCCTTCCCTGTTTTCTCC	AGAGGATGACATGATCTTTGACTTT	240	3C
rs3736331	TTTAACCCCTAAGCCACGGG	CCTACGTCCACTTGGGTTCA	211	2E
rs3739868	GATTGGAGCTGACTCGTTGC	GGTTGAACGTTGAGGCTGTT	260	3G
rs3744921	ACCTCCACTTCATCCGTGAG	TCCAGTCGGTTTTCACATCA	270	2A
rs3756323	CTACAAAACTCCCGCTCTGC	ACAAGCCTTCAAGAGGGTGA	273	2D
rs3765534	TCCAGTGGCTGATTTTCTGA	CCATGTTCCATAGGGCAAAC	368	3B
rs3778922	GAGCCCTTGTCATCCAACAC	TCCAGCTCTTACCCTTCATTTC	372	3C
rs3781409	AGCCCGACACCAGGTATG	TGGACAGGTCAGCTTCGTAA	258	2C
rs3799879	GACTCTGGATGAGGCGTGTT	AAGCAAGAGCTGCGCCTTAG	249	3J
rs3804491	ACGACAGAGAAAAACACTGGTGC	GAGGTTGTCCTAAATGCCTACCA	244	3H
rs4687887	CATACTCCTGGGAGCCTTGC	GATCTGGCAGGGCAAGAAGT	242	2E
rs56234154	AGTCCAAATTTCTTTAACCTGCCC	TCAGAGGATCACCTCCCAATCT	203	3H
rs6133198	AAATGCGGCTGTTTGCATGA	CCTGAACCATCCCTCAGAGC	336	3K
rs74072017	ATAGCATCCAGGTGCAGTCC	GGCCCCTTTTCACAGAGTTC	268	3M
rs75092884	GGGAGGGGTTGACAGACTTT	TTGCACAGATGGGTTTTTGA	263	3I
rs77504770	AGAGAGGGACTTGACTTGCAT	AAACAGAATCACAATGGTTATCACA	256	3L
rs79707667	GCTGTAACAATTGGGTGTTATGC	CCATACTGGGGAGTTTGGGAC	232	3G
rs7995174	TGGCAGTTTACCAGTCAGCA	CCGCCTGGATGGTGTTTCTT	543	3I
rs79980740	ACTCCAGGACCTCCCACTCT	CCCTGGCTAACATGGCTAAA	445	2E
rs928302	ATTTCATCAGCTGCCTTTGG	GGTTCTGTGGCTTTCTGCTC	419	2B
rs9932051	GGCTATGGAATTGATTATTGCAG	AGCTGAAATGTGACCCAAATG	242	3A
3A-3F: PCR was performed by 3-step with 60°C in annealing temperature.
3G-3M: PCR was performed by 3-step with 62°C in annealing temperature.
2A-2E: PCR was performed by 2-step.

## Sheet: Table S3
Table S3 Allele frequencies of 75 loci in the mainland and Okinawan Japanese.
SNP	Alele	Mainland (N=48)	Okinawan (N=46)		SNP	Alele	Mainland (N=48)	Okinawan (N=46)
rs10487075	A	0.10417	0.19565		rs3131854	C	0.79167	0.95652
	G	0.89583	0.80435			T	0.20833	0.043478
rs10505662	G	0.083333	0.22826		rs35961591	C	0.94792	0.70652
	T	0.91667	0.77174			G	0.052083	0.29348
rs10512572	A	0.64444	0.46739		rs3732530	A	0.64583	0.73913
	G	0.35556	0.53261			C	0.35417	0.26087
rs11145017	C	0.5	0.65217		rs3734166	A	0.55208	0.46739
	T	0.5	0.34783			G	0.44792	0.53261
rs11585486	C	0.052083	0.29348		rs3736331	A	0.052083	0.25
	T	0.94792	0.70652			G	0.94792	0.75
rs12498138	A	0.095745	0.021739		rs3739868	A	0.0625	0.30435
	G	0.90426	0.97826			T	0.9375	0.69565
rs12544346	A	0.39583	0.53261		rs3744921	A	0.90625	0.75
	G	0.60417	0.46739			G	0.09375	0.25
rs12629908	A	0.38542	0.27174		rs3745099	A	0.625	0.48913
	G	0.61458	0.72826			G	0.375	0.51087
rs13074239	A	0.125	0.31522		rs3756323	C	0.041667	0.15217
	G	0.875	0.68478			T	0.95833	0.84783
rs14103	A	0.89583	0.75		rs3765534	C	0.82292	0.70652
	C	0.10417	0.25			T	0.17708	0.29348
rs1503767	G	0.66667	0.54348		rs3778922	A	0.083333	0.19565
	T	0.33333	0.45652			C	0.91667	0.80435
rs1569175	C	0.86458	0.95652		rs3781409	A	0.34375	0.31522
	T	0.13542	0.043478			G	0.65625	0.68478
rs17048799	C	0.14583	0.22826		rs3799879	A	0.072917	0.21739
	T	0.85417	0.77174			G	0.92708	0.78261
rs17142849	A	0.010417	0.097826		rs3804491	C	0.91667	0.76087
	C	0.98958	0.90217			T	0.083333	0.23913
rs17707947	C	0.82292	0.78261		rs3907047	C	0.60417	0.42391
	T	0.17708	0.21739			T	0.39583	0.57609
rs17822931	C	0.13542	0.33696		rs4463276	A	0.875	0.69565
	T	0.86458	0.66304			G	0.125	0.30435
rs1800414	C	0.73958	0.54348		rs4687887	A	0.92708	0.86957
	T	0.26042	0.45652			G	0.072917	0.13043
rs1834619	A	0.67708	0.83696		rs4746136	A	0.64583	0.5
	G	0.32292	0.16304			G	0.35417	0.5
rs1876482	A	0.76042	0.8587		rs4908343	A	0.625	0.80435
	G	0.23958	0.1413			G	0.375	0.19565
rs1950993	G	0.15625	0.054348		rs56234154	G	0.89583	0.86957
	T	0.84375	0.94565			T	0.10417	0.13043
rs2070235	A	0.83333	0.73913		rs6133198	C	0.95833	0.79348
	G	0.16667	0.26087			T	0.041667	0.20652
rs2075352	C	0.70833	0.69565		rs6548616	C	0.23958	0.13043
	T	0.29167	0.30435			T	0.76042	0.86957
rs2118303	A	0.94792	0.70652		rs671	A	0.34375	0.097826
	C	0.052083	0.29348			G	0.65625	0.90217
rs214678	C	0.13542	0.25		rs705308	A	0.83333	0.94565
	T	0.86458	0.75			C	0.16667	0.054348
rs2166624	A	0.54167	0.42391		rs7251928	A	0.97917	0.91304
	G	0.45833	0.57609			C	0.020833	0.086957
rs2228226	C	0.54167	0.68478		rs731257	A	0.42708	0.26667
	G	0.45833	0.31522			G	0.57292	0.73333
rs2273697	A	0.072917	0.23913		rs74072017	C	0.9375	0.82609
	G	0.92708	0.76087			T	0.0625	0.17391
rs2274067	C	0.0625	0.27174		rs75092884	A	0.072917	0.13043
	G	0.9375	0.72826			C	0.92708	0.86957
rs2275586	C	0.92708	0.83696		rs77504770	G	0.90625	0.83696
	G	0.072917	0.16304			T	0.09375	0.16304
rs2285715	C	0.90625	0.77174		rs79707667	G	0.875	0.81522
	T	0.09375	0.22826			T	0.125	0.18478
rs2289080	A	0.13542	0.19565		rs7995174	A	0.09375	0.15217
	G	0.86458	0.80435			C	0.90625	0.84783
rs2289178	A	0.23958	0.33696		rs79980740	C	0.91667	0.81522
	C	0.76042	0.66304			T	0.083333	0.18478
rs2289403	A	0.95833	0.86957		rs8035124	A	0.23958	0.38043
	G	0.041667	0.13043			C	0.76042	0.61957
rs2295612	G	0.88542	0.91304		rs881728	A	0.3125	0.55435
	T	0.11458	0.086957			C	0.6875	0.44565
rs2465811	C	0.35417	0.44565		rs928302	C	0.67708	0.58696
	T	0.64583	0.55435			T	0.32292	0.41304
rs2589957	A	0.083333	0.29348		rs9845457	A	0.875	0.69565
	G	0.91667	0.70652			G	0.125	0.30435
rs2702414	A	0.4375	0.57609		rs9932051	C	0.78125	0.75
	G	0.5625	0.42391			T	0.21875	0.25
rs2966849	A	0.34375	0.51087
	G	0.65625	0.48913
The markers included in the 22 SNP set are highlighted in gray.

## Sheet: Table S4
Table S4 Number of called genotypes, observed and expected heterozygosity, and P-values for deviations from HWE for 75 loci in mainland and Okinawan Japanese.
Mainland Japanese							Okinawan Japanese
Locus	Genotypes (N)	Heterozigosity		P-value	S.D.		Genotypes (N)	Heterozigosity		P-value	S.D.
		Observed	Expected					Observed	Expected
rs10487075	48	0.20833	0.1886	1	0		46	0.26087	0.3182	0.33728	0.00049
rs10505662	48	0.16667	0.15439	1	0		46	0.36957	0.35619	1	0
rs10512572	45	0.44444	0.46342	1	0		46	0.5	0.50334	1	0
rs11145017	48	0.375	0.50526	0.08906	0.00029		46	0.56522	0.45867	0.18905	0.00041
rs11585486	48	0.10417	0.09978	1	0		46	0.41304	0.41925	1	0
rs12498138	47	0.14894	0.17502	0.34392	0.00049		46	0.04348	0.043	1	0
rs12544346	48	0.5	0.48333	1	0		46	0.45652	0.50334	0.56437	0.00049
rs12629908	48	0.5625	0.47873	0.35728	0.00046		46	0.54348	0.40014	0.02007	0.00015
rs13074239	48	0.25	0.22105	1	0		46	0.5	0.43645	0.49259	0.00053
rs14103	48	0.125	0.1886	0.0637	0.00023		46	0.32609	0.37912	0.43017	0.00051
rs1503767	48	0.5	0.44912	0.52337	0.00051		46	0.56522	0.50167	0.55253	0.00051
rs1569175	48	0.27083	0.23662	0.5752	0.00051		46	0.08696	0.08409	1	0
rs17048799	48	0.29167	0.25175	0.57153	0.00048		46	0.28261	0.35619	0.205	0.0004
rs17142849	48	0.02083	0.02083	1	0		46	0.1087	0.17845	0.04276	0.0002
rs17707947	48	0.27083	0.29452	0.62135	0.00048		46	0.3913	0.344	0.66209	0.00047
rs17822931	48	0.22917	0.23662	1	0		46	0.45652	0.45174	1	0
rs1800414	48	0.39583	0.38925	1	0		46	0.6087	0.50167	0.23147	0.00044
rs1834619	48	0.39583	0.44189	0.51611	0.00051		46	0.32609	0.27592	0.58024	0.00048
rs1876482	48	0.35417	0.3682	1	0		46	0.28261	0.24534	0.57151	0.00049
rs1950993	48	0.27083	0.26645	1	0		46	0.1087	0.10392	1	0
rs2070235	48	0.33333	0.2807	0.32201	0.00048		46	0.47826	0.38987	0.24439	0.00045
rs2075352	48	0.45833	0.41754	0.72598	0.00044		46	0.47826	0.42809	0.50027	0.0005
rs2118303	48	0.0625	0.09978	0.10386	0.00032		46	0.41304	0.41925	1	0
rs214678	48	0.27083	0.23662	0.57643	0.00048		46	0.41304	0.37912	0.70203	0.00045
rs2166624	48	0.375	0.50175	0.0904	0.00027		46	0.45652	0.49379	0.76328	0.00043
rs2228226	48	0.45833	0.50175	0.57234	0.00049		46	0.5	0.43645	0.49178	0.00049
rs2273697	48	0.14583	0.13662	1	0		46	0.34783	0.36789	0.69747	0.00045
rs2274067	48	0.08333	0.11842	0.15287	0.00037		46	0.41304	0.40014	1	0
rs2275586	48	0.14583	0.13662	1	0		46	0.23913	0.27592	0.32423	0.00047
rs2285715	48	0.1875	0.17171	1	0		46	0.36957	0.35619	1	0
rs2289080	48	0.1875	0.23662	0.18514	0.00038		46	0.30435	0.3182	1	0
rs2289178	48	0.4375	0.3682	0.25056	0.00042		46	0.41304	0.45174	0.74078	0.00044
rs2289403	48	0.08333	0.0807	1	0		46	0.21739	0.22934	0.56053	0.00051
rs2295612	48	0.1875	0.20504	0.47494	0.0005		46	0.17391	0.16054	1	0
rs2465811	48	0.58333	0.46228	0.11152	0.00031		46	0.63043	0.49952	0.08268	0.00028
rs2589957	48	0.16667	0.15439	1	0		46	0.5	0.41925	0.28479	0.00045
rs2702414	48	0.45833	0.49737	0.76875	0.00042		46	0.5	0.49379	1	0
rs2966849	48	0.52083	0.45592	0.35677	0.00044		46	0.36957	0.50526	0.08348	0.00027
rs3131854	48	0.33333	0.33333	1	0		46	0.08696	0.08409	1	0
rs35961591	48	0.0625	0.09978	0.10345	0.00031		46	0.36957	0.41925	0.48329	0.00048
rs3732530	48	0.5	0.46228	0.75121	0.00042		46	0.3913	0.38987	1	0
rs3734166	48	0.47917	0.49978	1	0		46	0.45652	0.50334	0.56371	0.00048
rs3736331	48	0.10417	0.09978	1	0		46	0.36957	0.37912	1	0
rs3739868	48	0.125	0.11842	1	0		46	0.30435	0.42809	0.07682	0.00028
rs3744921	48	0.1875	0.17171	1	0		46	0.41304	0.37912	0.70242	0.00046
rs3745099	48	0.54167	0.47368	0.36753	0.00049		46	0.63043	0.50526	0.13807	0.00034
rs3756323	48	0.08333	0.0807	1	0		46	0.26087	0.26087	1	0
rs3765534	48	0.3125	0.29452	1	0		46	0.41304	0.41925	1	0
rs3778922	48	0.125	0.15439	0.27191	0.00043		46	0.34783	0.3182	1	0
rs3781409	48	0.27083	0.45592	0.00855	9e-05		46	0.32609	0.43645	0.09833	0.00029
rs3799879	48	0.10417	0.13662	0.21059	0.0004		46	0.3913	0.344	0.66151	0.00048
rs3804491	48	0.16667	0.15439	1	0		46	0.34783	0.36789	0.69686	0.00044
rs3907047	48	0.5	0.48333	1	0		46	0.5	0.49379	1	0
rs4463276	48	0.16667	0.22105	0.13601	0.00033		46	0.47826	0.42809	0.50186	0.00047
rs4687887	48	0.14583	0.13662	1	0		46	0.21739	0.22934	0.5603	0.0005
rs4746136	48	0.41667	0.46228	0.53642	0.0005		46	0.47826	0.50549	0.77343	0.00042
rs4908343	48	0.375	0.47368	0.21727	0.00042		46	0.26087	0.3182	0.33625	0.00047
rs56234154	48	0.125	0.1886	0.06435	0.00024		46	0.21739	0.22934	0.56085	0.00049
rs6133198	48	0.08333	0.0807	1	0		46	0.23913	0.33134	0.07494	0.00026
rs6548616	48	0.3125	0.3682	0.42175	0.00049		46	0.21739	0.22934	0.56119	0.00049
rs671	48	0.60417	0.45592	0.02697	0.00017		46	0.19565	0.17845	1	0
rs705308	48	0.20833	0.2807	0.09995	0.0003		46	0.06522	0.10392	0.10806	0.0003
rs7251928	48	0.04167	0.04123	1	0		46	0.17391	0.16054	1	0
rs731257	48	0.52083	0.49452	0.7728	0.00042		46	0.35556	0.39551	0.70116	0.00045
rs74072017	48	0.125	0.11842	1	0		46	0.30435	0.29049	1	0
rs75092884	48	0.14583	0.13662	1	0		46	0.21739	0.22934	0.56096	0.00049
rs77504770	48	0.1875	0.17171	1	0		46	0.23913	0.27592	0.32481	0.00046
rs79707667	48	0.20833	0.22105	0.54285	0.0005		46	0.36957	0.30459	0.31733	0.00046
rs7995174	48	0.14583	0.17171	0.33673	0.00047		46	0.26087	0.26087	1	0
rs79980740	48	0.125	0.15439	0.27095	0.00045		46	0.32609	0.30459	1	0
rs8035124	48	0.35417	0.3682	1	0		46	0.36957	0.47659	0.20712	0.00038
rs881728	48	0.45833	0.43421	0.74923	0.00043		46	0.54348	0.49952	0.56546	0.00051
rs928302	48	0.3125	0.44189	0.05167	0.00021		46	0.47826	0.49021	1	0
rs9845457	48	0.20833	0.22105	0.54413	0.0005		46	0.47826	0.42809	0.50033	0.00049
rs9932051	48	0.3125	0.34539	0.66953	0.00046		46	0.28261	0.37912	0.11267	0.00031

## Sheet: Table S5
Table S5 Number of observed genotypes in the mainland and Okinawan Japanese, and P-values of the 75 markers by Fisher’s exact test.
SNP	P-value	Allele	Mainland	Okinawan		SNP	P-value	Allele	Mainland	Okinawan
rs10487075		AA	0	3		rs3131854		CC	30	42
	0.12519	AG	10	12			0.0020246	CT	14	4
		GG	38	31				TT	2	0
rs10505662		GG	0	2		rs35961591		CC	44	24
	0.0119424	GT	8	17			4.94e-05	CG	3	17
		TT	40	27				GG	1	5
rs10512572		AA	19	10		rs3732530		AA	19	25
	0.0249697	AG	20	23			0.430087	AC	24	18
		GG	6	13				CC	5	3
rs11145017		CC	15	17		rs3734166		AA	15	11
	0.0071038	CT	18	26			0.537523	AG	23	21
		TT	15	3				GG	10	14
rs11585486		CC	0	4		rs3736331		AA	0	3
	2.81e-05	CT	5	19			0.0004761	AG	5	17
		TT	43	23				GG	43	26
rs12498138		AA	1	0		rs3739868		AA	0	7
	0.122981	AG	7	2			0.0002613	AT	6	14
		GG	39	44				TT	42	25
rs12544346		AA	7	14		rs3744921		AA	39	25
	0.152322	AG	24	21			0.0078143	AG	9	19
		GG	17	11				GG	0	2
rs12629908		AA	5	0		rs3745099		AA	17	8
	0.0432241	AG	27	25			0.109783	AG	26	29
		GG	16	21				GG	5	9
rs13074239		AA	0	3		rs3756323		CC	0	1
	0.0022214	AG	12	23			0.0191712	CT	4	12
		GG	36	20				TT	44	33
rs14103		AA	40	27		rs3765534		CC	35	23
	0.0464504	AC	6	15			0.168044	CT	15	19
		CC	2	4				TT	1	4
rs1503767		GG	20	12		rs3778922		AA	1	1
	0.214051	GT	24	26			0.0255996	AC	6	16
		TT	4	8				CC	41	29
rs1569175		CC	35	42		rs3781409		AA	10	7
	0.0304525	CT	13	4			0.759568	AG	13	15
		TT	0	0				GG	25	24
rs17048799		CC	0	4		rs3799879		AA	1	1
	0.10349	CT	14	13			0.0033297	AG	5	18
		TT	34	29				GG	42	27
rs17142849		AA	0	2		rs3804491		CC	40	27
	0.0440794	AC	1	5			0.0100349	CT	8	16
		CC	47	39				TT	0	3
rs17707947		CC	33	27		rs3907047		CC	17	8
	0.446514	CT	13	18			0.0492478	CT	24	23
		TT	2	1				TT	7	15
rs17822931		CC	1	5		rs4463276		AA	38	21
	0.0065036	CT	11	21			0.0029422	AG	8	22
		TT	36	20				GG	2	3
rs1800414		CC	26	11		rs4687887		AA	41	35
	0.0092569	CT	19	28			0.352193	AG	7	10
		TT	3	7				GG	0	1
rs1834619		AA	23	31		rs4746136		AA	21	12
	0.0126789	AG	19	15			0.152672	AG	20	22
		GG	6	0				GG	7	12
rs1876482		AA	28	33		rs4908343		AA	21	31
	0.111061	AG	17	13			0.0539198	AG	18	12
		GG	3	0				GG	9	3
rs1950993		GG	1	0		rs56234154		GG	40	35
	0.0499861	GT	13	5			0.453358	GT	6	10
		TT	34	41				TT	2	1
rs2070235		AA	32	23		rs6133198		CC	44	31
	0.143044	AG	16	22			0.0054633	CT	4	11
		GG	0	1				TT	0	4
rs2075352		CC	23	21		rs6548616		CC	4	1
	1	CT	22	22			0.17979	CT	15	10
		TT	3	3				TT	29	35
rs2118303		AA	44	23		rs671		AA	2	0
	1.66e-05	AC	3	19			1.66e-05	AG	29	9
		CC	1	4				GG	17	37
rs214678		CC	0	2		rs705308		AA	35	42
	0.0769474	CT	13	19			0.134514	AC	10	3
		TT	35	25				CC	3	1
rs2166624		AA	17	9		rs7251928		AA	46	38
	0.242916	AG	18	21			0.0484382	AC	2	8
		GG	13	16				CC	0	0
rs2228226		CC	15	20		rs731257		AA	8	4
	0.0673327	CG	21	23			0.0638072	AG	25	16
		GG	11	3				GG	15	25
rs2273697		AA	0	3		rs74072017		CC	42	31
	0.0048738	AG	7	16			0.0317654	CT	6	14
		GG	41	27				TT	0	1
rs2274067		CC	1	3		rs75092884		AA	0	1
	0.000213	CG	4	19			0.352483	AC	7	10
		GG	43	24				CC	41	35
rs2275586		CC	41	33		rs77504770		GG	39	33
	0.135097	CG	7	11			0.300383	GT	9	11
		GG	0	2				TT	0	2
rs2285715		CC	39	27		rs79707667		GG	37	39
	0.0213249	CT	9	17			0.111013	GT	10	17
		TT	0	2				TT	1	0
rs2289080		AA	2	2		rs7995174		AA	1	1
	0.405024	AG	9	14			0.597592	AC	7	12
		GG	37	30				CC	40	33
rs2289178		AA	1	6		rs79980740		CC	41	30
	0.12411	AC	21	19			0.0666357	CT	6	15
		CC	26	21				TT	1	1
rs2289403		AA	44	35		rs8035124		AA	3	9
	0.060866	AG	4	10			0.107509	AC	17	17
		GG	0	1				CC	28	20
rs2295612		GG	38	38		rs881728		AA	4	13
	1	GT	9	8			0.0030774	AC	22	25
		TT	1	0				CC	22	8
rs2465811		CC	3	6		rs928302		CC	25	16
	0.327057	CT	28	29			0.194672	CT	15	22
		TT	17	11				TT	8	8
rs2589957		AA	0	2		rs9845457		AA	37	21
	0.0002066	AG	8	23			0.0068809	AG	10	22
		GG	40	21				GG	1	3
rs2702414		AA	10	15		rs9932051		CC	30	28
	0.168198	AG	22	23			0.775139	CT	15	13
		GG	16	8				TT	3	5
rs2966849		AA	4	15
	0.0134314	AG	25	17
		GG	19	14

## Sheet: Table S6
Table S6 AMOVA FST (% variation) and P-values of the 75 markers evaluated in this study.
Locus	% variation	P-value		Locus	% variation	P-value
rs10487075	2.20706	0.12059		rs3131854	10.5482	0.00059
rs10505662	6.74585	0.00752		rs35961591	17.8244	0
rs10512572	5.10811	0.02218		rs3732530	0.96546	0.19535
rs11145017	3.60085	0.04554		rs3734166	0.36454	0.32505
rs11585486	17.8244	0		rs3736331	13.4215	0.0004
rs12498138	3.76839	0.07584		rs3739868	17.0844	0.0001
rs12544346	2.65685	0.08713		rs3744921	7.29796	0.00426
rs12629908	1.83641	0.07624		rs3745099	2.63835	0.0495
rs13074239	9.10726	0.00129		rs3756323	5.80977	0.01267
rs14103	6.08776	0.02327		rs3765534	2.67272	0.08396
rs1503767	2.08714	0.08604		rs3778922	4.13621	0.03693
rs1569175	3.98786	0.03089		rs3781409	-0.88979	0.79257
rs17048799	1.16542	0.1995		rs3799879	7.15186	0.00594
rs17142849	6.31105	0.02218		rs3804491	7.67503	0.00624
rs17707947	-0.55765	0.57663		rs3907047	5.29195	0.01812
rs17822931	9.76105	0.00248		rs4463276	8.18467	0.00455
rs1800414	7.05651	0.00347		rs4687887	0.74799	0.2397
rs1834619	5.67995	0.01099		rs4746136	3.22738	0.06743
rs1876482	2.0287	0.0901		rs4908343	6.56417	0.01842
rs1950993	4.29773	0.03317		rs56234154	-0.73883	0.68426
rs2070235	1.5668	0.1095		rs6133198	10.9543	0.00248
rs2075352	-1.03691	0.86673		rs6548616	2.82144	0.07584
rs2118303	17.8244	0		rs671	15.1285	0
rs214678	3.12102	0.04921		rs705308	5.15167	0.04168
rs2166624	1.6917	0.13574		rs7251928	3.21854	0.04733
rs2228226	3.19026	0.05386		rs731257	4.47567	0.03624
rs2273697	9.08812	0.00248		rs74072017	4.81836	0.0196
rs2274067	13.8085	0.0003		rs75092884	0.74799	0.23069
rs2275586	2.82057	0.08158		rs77504770	1.08003	0.20188
rs2285715	5.5199	0.01574		rs79707667	0.29931	0.28406
rs2289080	0.24714	0.35634		rs7995174	0.51815	0.28703
rs2289178	1.23797	0.14079		rs79980740	3.33705	0.05436
rs2289403	3.91245	0.0401		rs8035124	3.51728	0.05475
rs2295612	-0.65207	0.64406		rs881728	10.3001	0.00059
rs2465811	0.67298	0.16317		rs928302	0.67596	0.2595
rs2589957	12.6537	0.0001		rs9845457	8.18467	0.00356
rs2702414	2.73407	0.0704		rs9932051	-0.80083	0.74653
rs2966849	4.53781	0.03327
The markers included in the 22 SNP set are highlighted in gray.

## Sheet: Table S7
Table S7 Median Log10(LR)* and range of LRs† for Mainland Japanese
Population B	Population A: Mainland Japanese
	Accepted (75 SNPs)	Ambiguous (75 SNPs)	Accepted (22 SNPs)	Ambiguous (22 SNPs)
Okinawans	4.3 (2.3-7.7)	3.5 (1.8-5.8)	3.4	2.4 (1.0-5.1)
Han Chinese (Beijing)	4.2 (3.0-5.7)	2.7 (1.4-5.0)	1.9	1.6 (1.0-4.2)
Vietnam	3.9 (2.5-4.9)	2.6 (0.6-5.2)	1.2	1.5 (0.4-4.2)
*LR=P(AIM profile│Population A)/P(AIM profile│Population B). LR was calculated if the two likelihoods were significantly different.
†Range of LRs are shown in parenthesis
