# Supplementary material
Source: publisher figshare collection journal article supplement (https://tandf.figshare.com/articles/dataset/_/24272170)
Supplement: Supplementary file 1 [file 1]

## Supplementary Figure 1

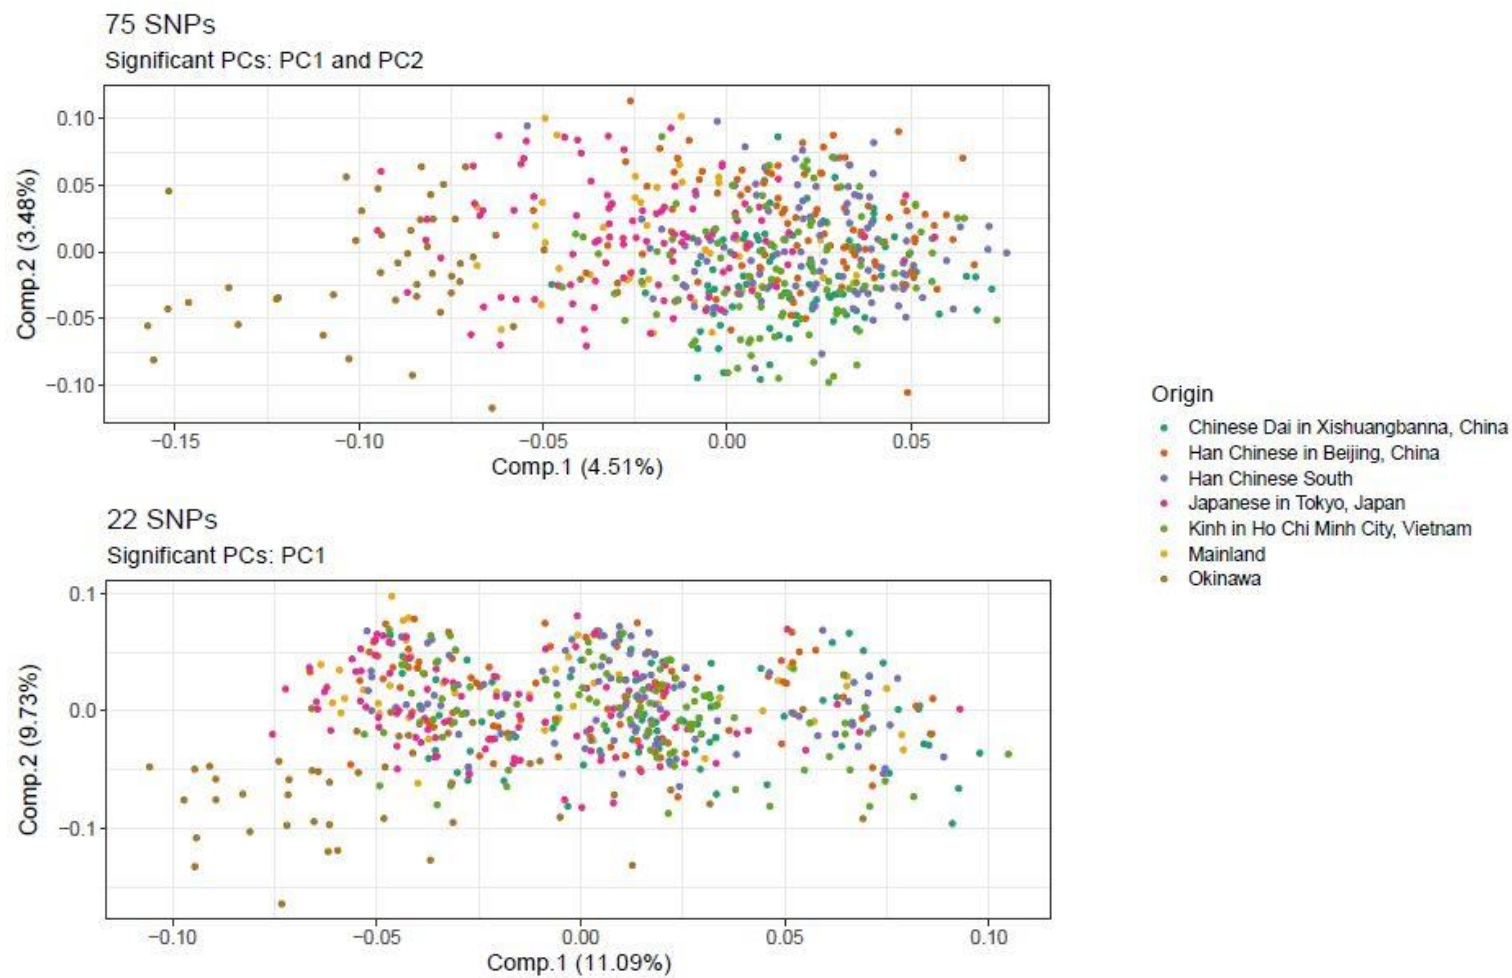

Figure S1 – PCA plots based on the 75 (top) and 22 (bottom) SNP sets.

## Supplementary Figure 2

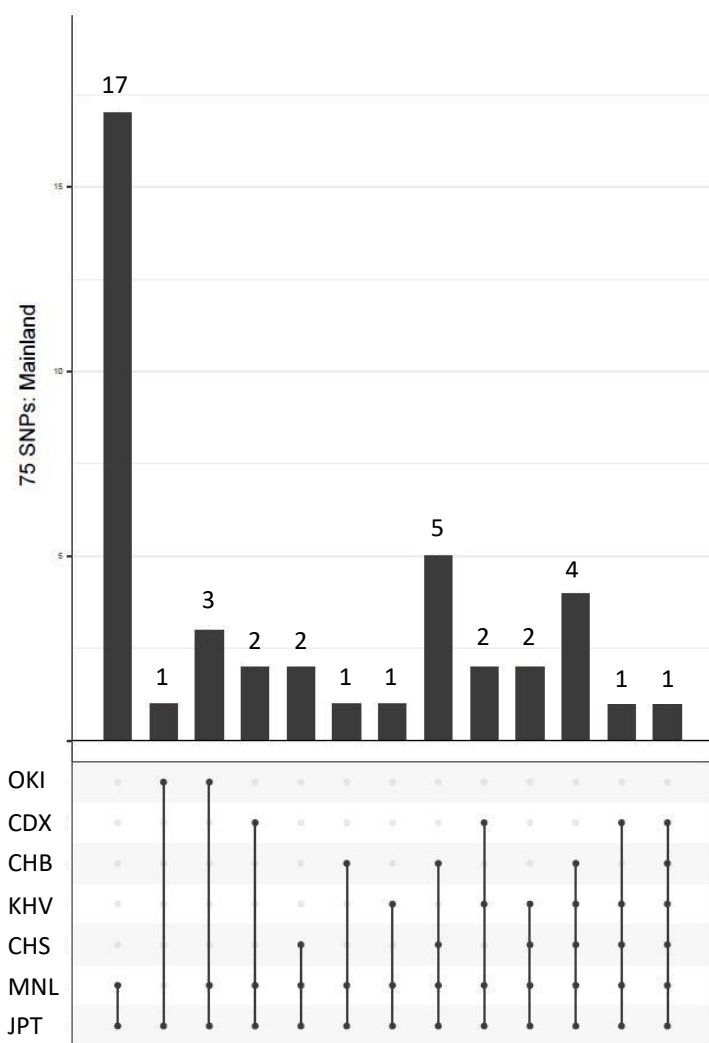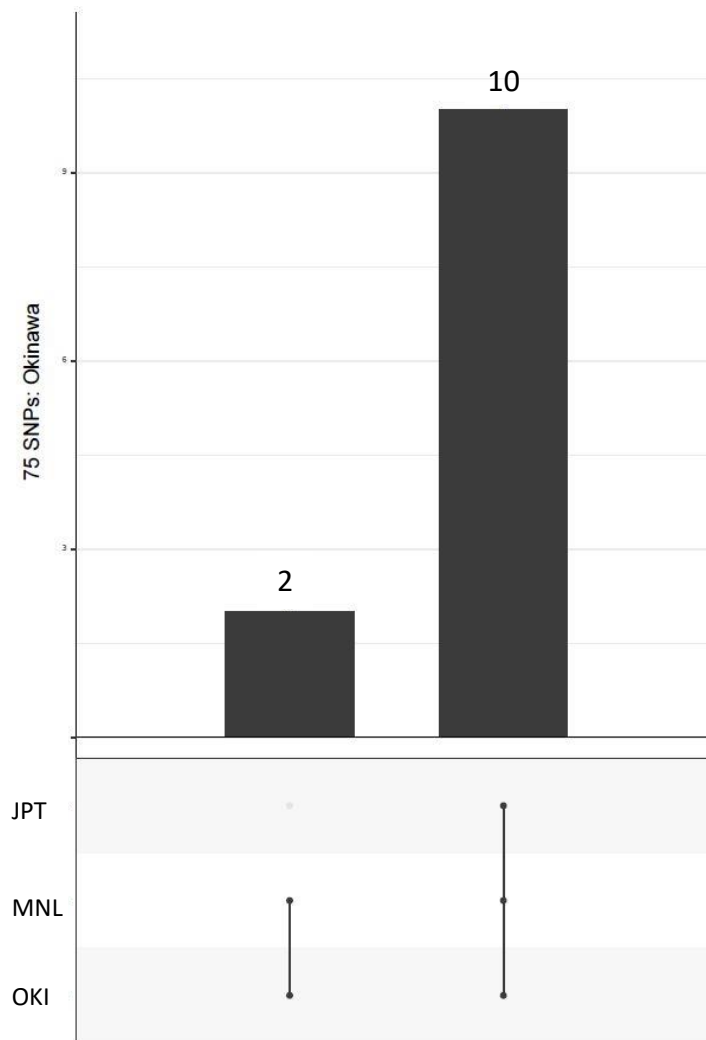

Figure S2 – The GenoGeographer population assignment of the mainland (left) and Okinawa (right) Japanese based on the 75 SNP set. The histogram represents the number of individuals classified as ‘Ambiguous’, with the respective population assignments represented below.

## Supplementary Figure 3

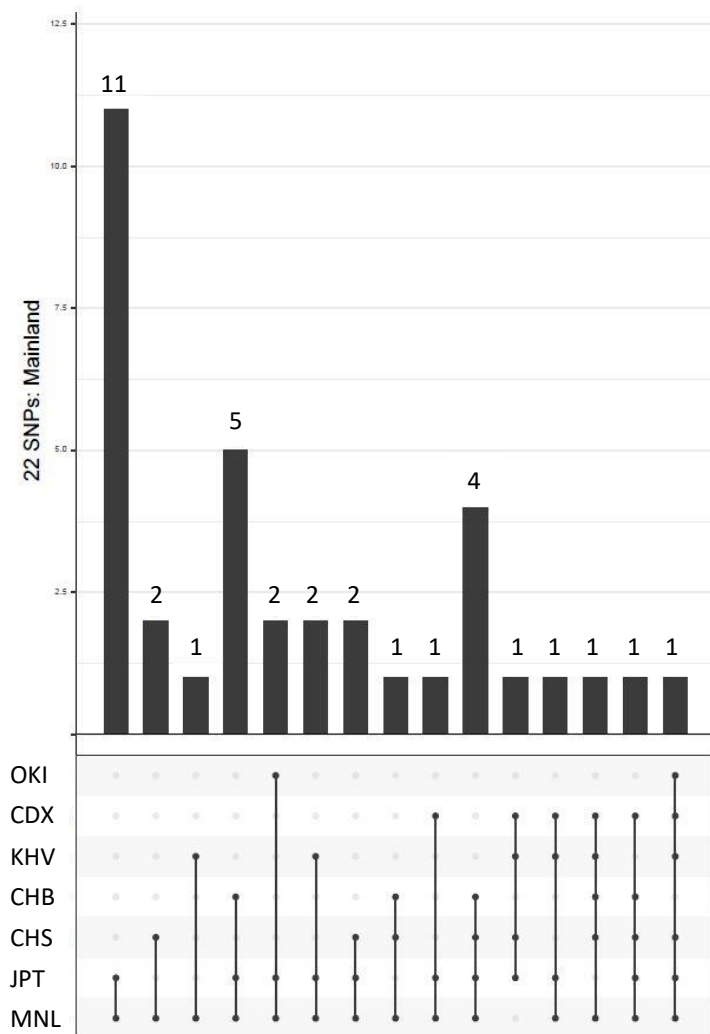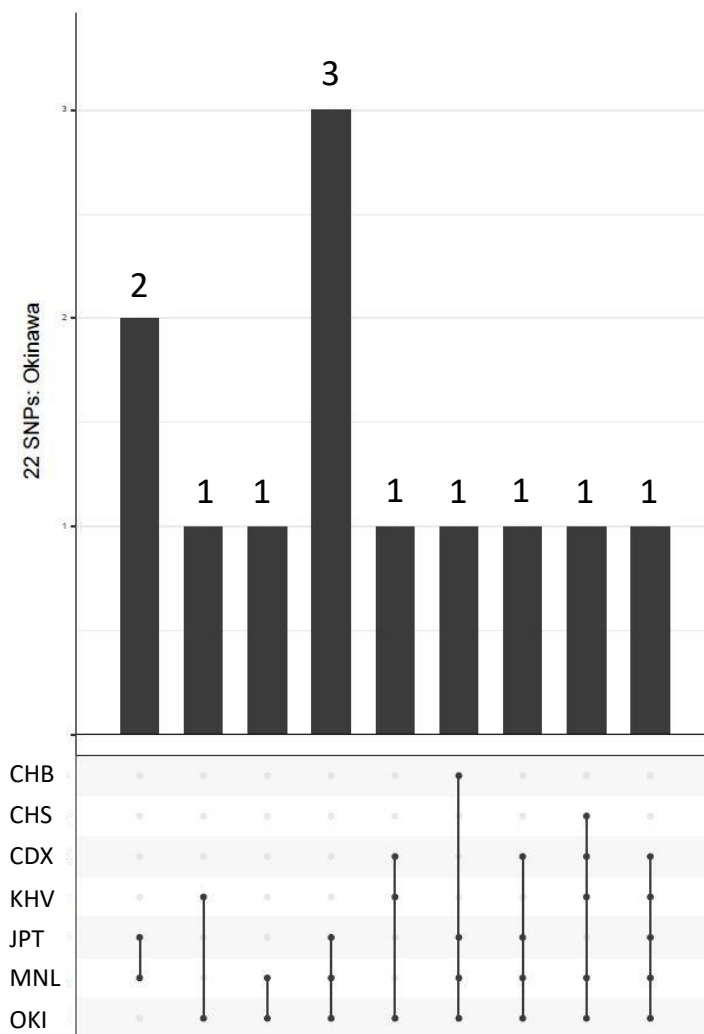

Figure S3 – The GenoGeographer population assignment of the mainland Japanese (left) and Okinawa (right) Japanese based on the 22 SNP set. The histogram represents the number of individuals classified as ‘Ambiguous’, with the respective population assignments represented below.
